# Supplementary material for: Handheld real-time PCR device
Source: Royal Society of Chemistry journal article supplement (doi:10.1039/c5lc01415h), 2015-12-17
Supplement: c5lc01415h1.pdf [file c5lc01415h1.pdf]

## Supplementary data:

### 1. Cross section of the optical housing

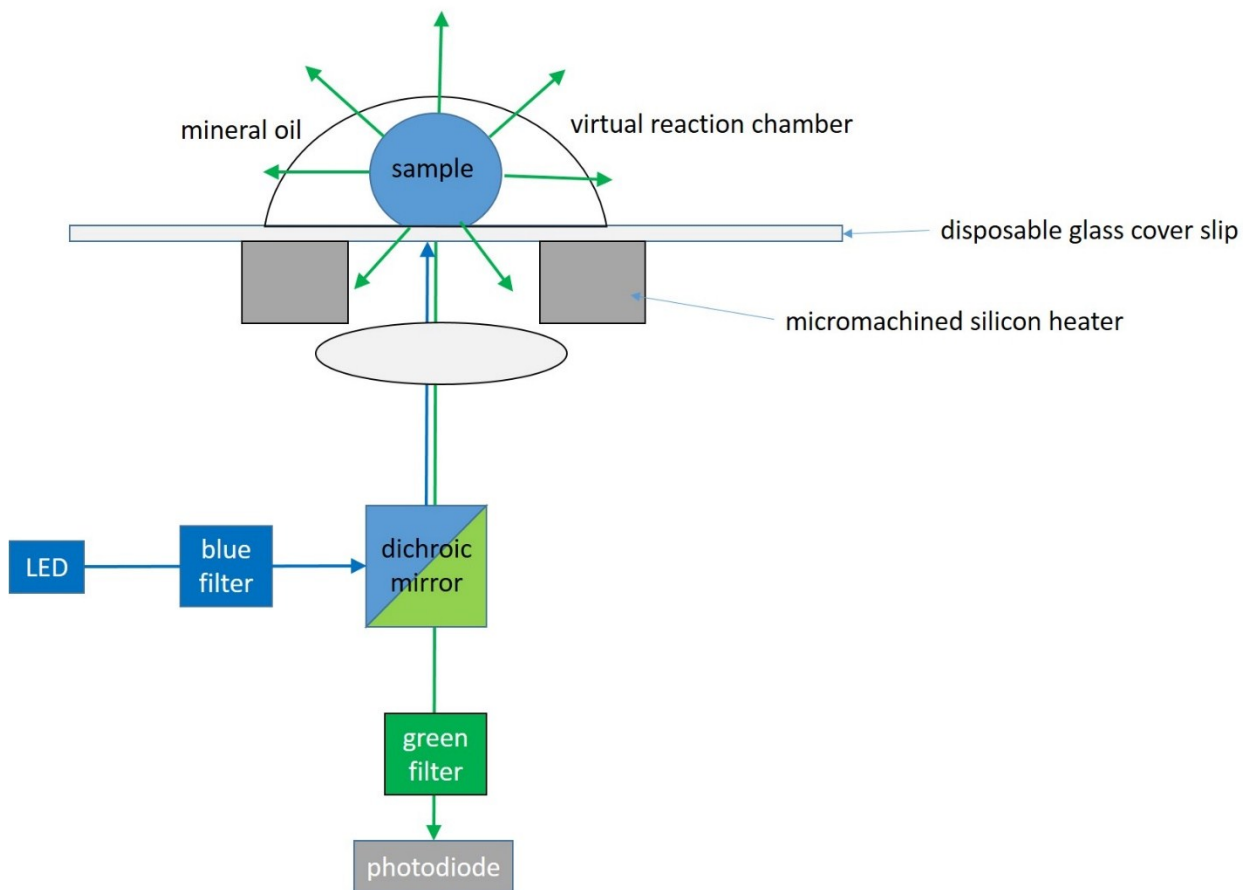

Figure 1: Cross section schematic of the handheld PCR system illustrating the optical path. Light emanating from the LEDs is filtered, then deflected by a dichroic mirror, and focused via lenses onto the VRC. A disposable glass slide separates the VRC from the micromachined silicon chip. The emitted fluorescence is collimated (using the same set of lenses), then passes through the dichroic mirror and a green filter prior to being captured by the photodiode.

## 2. Schematic of the PCR system

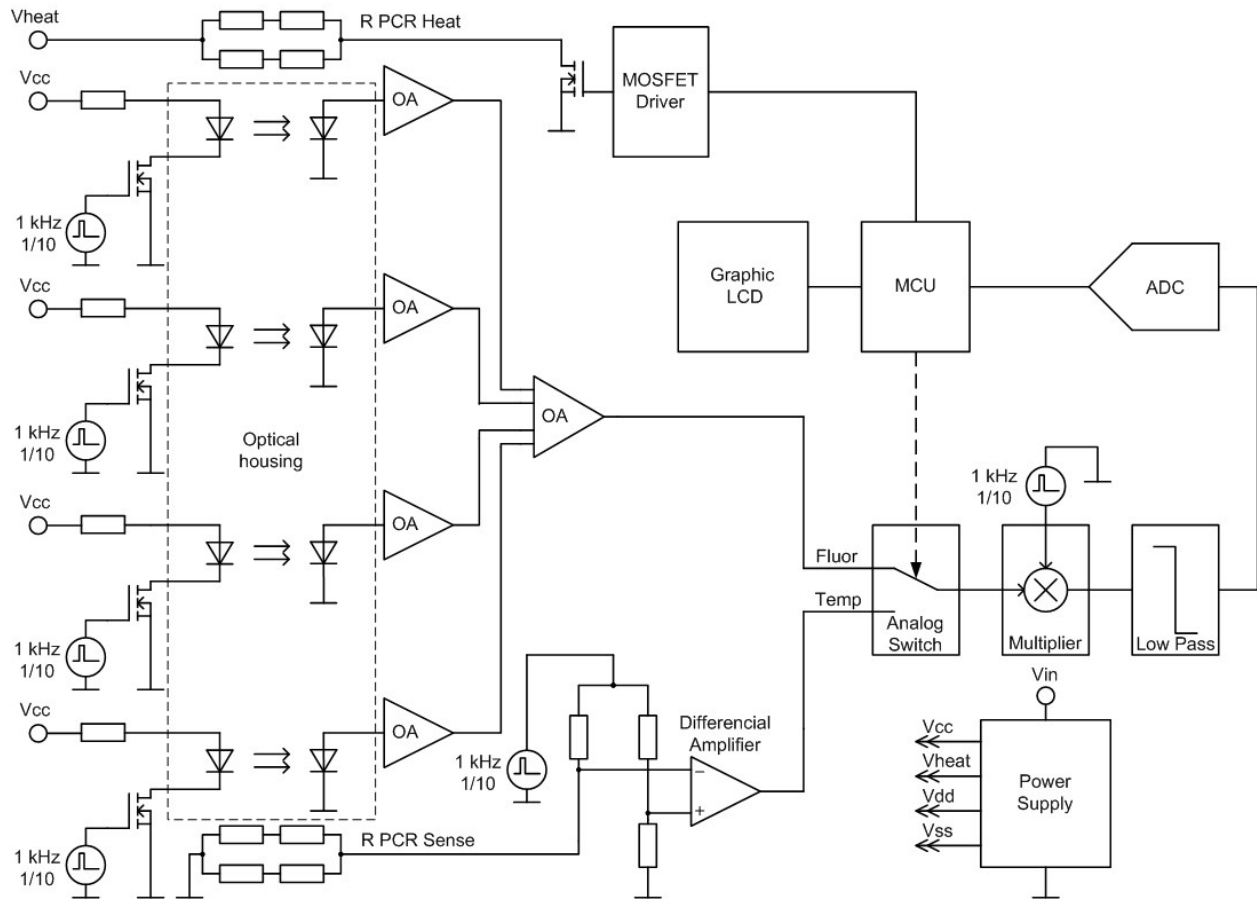

Figure 2: PCR electrical schematic showing four blocks of the fluorescent system inside the optical housing followed by transconductance operation amplifiers, by a generic amplifier and a Wheatstone bridge for temperature monitoring. The analog selector was used for further processing either the fluorescence or the temperature signals by the microcomputer (MCU) via an analog to digital converter (ADC). The processor also controls the dissipated Joule heat within the PCR chip and its temperature via a MOSFET driver.



### 3. List of components: Table 1

| category         | type                                         | parameters                                                                 | number |
|------------------|----------------------------------------------|----------------------------------------------------------------------------|--------|
| electrical       | Square wave generator                        | Frequency: 1 kHz<br>duty cycle: 10 %                                       | 6      |
|                  | Power MOSFET                                 | N-channel MOSFET<br>with $R_{DS(on)} = 170 \text{ m}\Omega$                | 4      |
|                  | Power MOSFET                                 | N-channel MOSFET<br>with $R_{DS(on)} = 30 \text{ m}\Omega$                 | 1      |
|                  | LED                                          | Wavelength: 470 nm<br>Luminous intensity:<br>7.2 – 12 cd<br>Diameter: 5 mm | 4      |
|                  | photodiode                                   | $7.4 \text{ mm}^2$                                                         | 4      |
|                  | Operation amplifier                          | diFET with bias<br>current < 100 fA                                        | 4      |
|                  | Operation amplifier                          | Noise < 15 nV/ $\sqrt{\text{Hz}}$ @<br>1 kHz                               | 1      |
|                  | Differential amplifier                       | Noise < 8 nV/ $\sqrt{\text{Hz}}$ @<br>1 kHz                                | 1      |
|                  | Analog switch/analog<br>to digital converter | 16 bit resolution, 2<br>selectable<br>differential inputs                  | 1      |
|                  | Analog multiplier                            | 4-quadrant analog<br>multiplier                                            | 1      |
|                  | Low pass filter                              | 2 Hz cut off                                                               | 1      |
|                  | MCU                                          | 16 bit<br>microprocessor                                                   | 1      |
|                  | Graphic display                              | $84 \times 42$ pixels                                                      | 1      |
|                  | Switched power<br>supply                     | Generating DC<br>voltages: +5V, $\pm 12\text{V}$ ,<br>+18V                 | 1      |
| thermomechanical | Micromachined<br>silicon chip                | Custom layout,<br>integrated with thin<br>film heater and RTD<br>sensor    | 1      |
| optical          | Optical housing                              | Made by CNC                                                                | 1      |
|                  | Low pass filter                              | 490 nm                                                                     | 2      |
|                  | Dichroic mirror                              | 495 nm                                                                     | 2      |
|                  | Long pass filter                             | 510 nm                                                                     | 1      |
|                  | Lens                                         | Diameter: 6.35 mm<br>N.A.: 0.68<br>Focal length: 3.1 mm                    | 4      |



#### 4. PCR chip layout

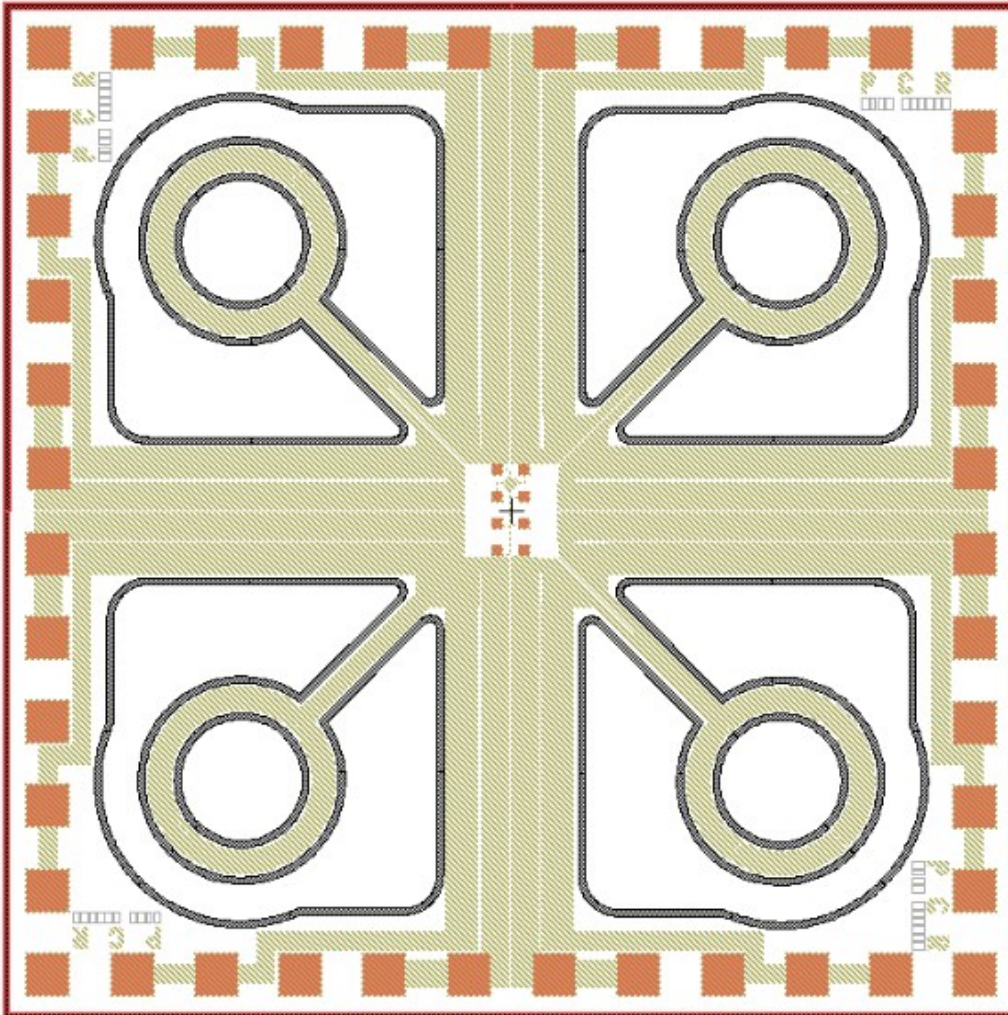

Figure 3 Layout of the PCR chip. The chip is square size with side of  $\approx 15$  mm. The distance between heater centers is  $\approx 8$ mm.

5. PCR chip fabrication process
  - a. Starting substrate silicon wafers with diameter of  $\approx 100$  mm
  - b.  $\text{SiO}_2$  deposition by plasma enhanced chemical vapor deposition (PECVD) process with thickness of  $\approx 0.5$   $\mu\text{m}$
  - c. Au/Cr deposition by sputtering with thickness of  $\approx 200$  nm and  $\approx 5$  nm for Au and Cr, respectively
  - d. Contact lithography (Au/Cr patterning)
    - i. Positive photoresist (PR) spincoating with PR thickness between 1 and 2  $\mu\text{m}$
    - ii. PR pre-bake
    - iii. Soft contact exposure
    - iv. Postbake
    - v. PR developing
    - vi. Wafer spin drying
  - e. Au/Cr patterning by ion milling with secondary ion mass spectroscopy (SIMS) end point detection
  - f. PR removal by acetone and 2-n propyl alcohol or stripper
  - g.  $\text{SiO}_2$  deposition by plasma enhanced chemical vapor deposition (PECVD) process with thickness of  $\approx 0.5$   $\mu\text{m}$ .
  - h. Contact lithography (bond pads opening)
    - i. PR spincoating with PR thickness between 1  $\mu\text{m}$  and 2  $\mu\text{m}$
    - ii. PR pre-bake
    - iii. Soft contact exposure
    - iv. Postbake
    - v. PR developing
    - vi. Wafer spin drying
  - i.  $\text{SiO}_2$  etching by  $\approx 40$  %  $\text{NH}_4\text{F}$  and  $\approx 49$  % HF in ratio of  $\approx 7 : 1$  (BOE 7:1)
  - j. PR removal by acetone and 2-n propyl alcohol or stripper
  - k. Contact lithography (silicon etching)
    - i. PR spincoating with PR thickness between 8 and 12  $\mu\text{m}$
    - ii. PR pre-bake
    - iii. Soft contact exposure
    - iv. PR developing
    - v. Postbake
    - vi. Wafer spin drying
  - l.  $\text{SiO}_2$  etching by BOE 7:1
  - m. Silicon etching by Bosch process through silicon water
  - n. PR removal by acetone and 2-n propyl alcohol or stripper
  - o. Chips drying by  $\text{N}_2$
  - p. Soldering chips to the printed circuit boards
